# Supplementary material
Source: PubMed Central journal article supplement (PMC2898339)
Supplement: supp_M110.113761_SupFig1.pdf [file supp_M110.113761_SupFig1.pdf]

```

AroA_S22 MSAPKDRITLPPKDAARTNMTCHFCIVGCGYHVYKWPPEQSEGGRAFEEENALGQDFRQQLS 60
AroA_SY8 MSAPKDRITLPPKDAARTNMTCHFCIVGCGYHVYKWPPEQSEGGRAFEEENALGQDFRQQLS 60
AroA_Afae -GCPNDRITLPPANAQRTNMTCHFCIVGCGYHVYKWPPELEEGGRAFENALGLDFRQQLP 59
AroA_Hars MSKNRDRVALPPVNAQRTNMTCHFCIVGCGYHVYKWPPELEEGRAANQNALGLDFRQQLP 60
AroA_Bmul MATNKNDRVALPPVNAQRTNMTCHFCIVGCGYHVYKWPPELEEGRAFENQNALGLDFRQQLP 60
. : : : : : : : : : : : : : : : : : : : : : : : : : : : : : : : : : : : : : : :
AroA_S22 PFAITLTPAMTNVITQRDGSRRHIMIVPDKCEVNVNGLSSRTRGGRMASYMYTPDGDGKA 119
AroA_SY8 PFAITLTPAMTNVITQRDGSRRHIMIVPDKCEVNVNGLSSRTRGGRMASYMYTPDGDGKA 119
AroA_Afae PLAVTLPAMTNVITEDGARDIMVVPDKACVNVNGLSSRTRGGRMASYMYTPDGDGKA 118
AroA_Hars PFAITLTPAMTNVITAKNGKRSNIMIVPDKCEVNVNGLSSRTRGGRMASYMYAADG-MTAD 119
AroA_Bmul PLSIVMTFAMQNTITDKDGRRYNIMVVPDKACSVNRGLSSRTRGGRMASYMYSPDGGVAKE 120
. : : : : : : : : : : : : : : : : : : : : : : : : : : : : : : : : : : : : : : :

AroA_S22 RLSQPRMYAADDQWVDPWPDKALALYAGLLKLVLDNDGPEGIVFSCFDHGGAGGGFENTWG 179
AroA_SY8 RLSQPRMYAADDQWVDPWPDKALALYAGLLKLVLDNDGPEGIVFSCFDHGGAGGGFENTWG 179
AroA_Afae RLSAPRLYAADQWVDTTWVDDHAMAALYAGLLKLVLDNDGPEGIVFSCFDHGGAGGGFENTWG 179
AroA_Hars RLKYPREFYADDQWLDTSWDHAMAALYAGLLKLVLDNDGPEGIVFSCFDHGGAGGGFENTWG 179
AroA_Bmul RLRSPRVYLAQDQWMDTSDDAALALYAGLLKLVLDNDGPEGIVFSCFDHGGAGGGFENTWG 180
. : : : : : : : : : : : : : : : : : : : : : : : : : : : : : : : : : : : : : : .

AroA_S22 TGKLMFTALQTPMVR IHNRPAYNSEC HATREMGIGELNNAYEDAELADVLWISGNNPYES 239
AroA_SY8 TGKLMFTALQTPMVR IHNRPAYNSEC HATREMGIGELNNAYEDAELADVLWISGNNPYES 239
AroA_Afae TGKLMFSAALQTPMVR IHNRPAYNSEC HATREMGIGELNNAYEDAQLADVLSISGNNPYES 238
AroA_Hars SGKLMFSAALQTPMVR IHNRPAYNSEC HATREMGIGELNNAYEDAQLADVLSISGNNPYET 239
AroA_Bmul TGKLMFTALKTPVLR IHNRPAYNSEC HATREMGIGELNNAYEDAELADVLWISGNNPYET 240
. : : : : : : : : : : : : : : : : : : : : : : : : : : : : : : : : : : : : : : .

AroA_S22 QTNFYLHNHWPVNLGYQTVEKKAARFAGE DLPDTRIVFVDPDRTPSIAIARQIVGKDRLLH 299
AroA_SY8 QTNFYLHNHWPVNLGYQTVEKKAARFAGE DLPDTRIVFVDPDRTPSIAIARQIVGKDRLLH 299
AroA_Afae QTNFYLHNHWPVNLGYQTVEKKAARFAGENFPQARIIFVDPDRTPSIVAIARHVAAGNDRVLL 298
AroA_Hars QTNFYLHNHWPVNLGNGSTEKKAARFAGE PVGPGLMIFVDPDRTPSIAIAEQTA-KDVLH 298
AroA_Bmul QTNFYLHNHWPVNLGNGSTEKKAARFAGE PVGPGLMIFVDPDRTPSIVAIARHVAAGNDRVLL 300
. : : : : : : : : : . : : : : : : : : : : : : : : : : : : : : : : : : : : : .

AroA_S22 LAIEPGTDIALFNGLFTYVVDQGWIDKPIFKDHTSGFDEAVKTNRMPLDEC SKITGVVPE 359
AroA_SY8 LAIEPGTDIALFNGLFTYVVDQGWIDKPIFKDHTSGFDEAVKTNRMPLDEC SKITGVVPE 359
AroA_Afae LAIEPGTDIALFNGLFTYVVEQGWIDKPIEAHFKGFDVAVKNRMSLDEC SKITGVVPE 358
AroA_Hars LDINFGTDVAIFNGLFTYVVDQGWIAKEPFAQHTVGFDAVKTNQMSLADC SRITGVVPE 358
AroA_Bmul LDIEPGTDIAIFNGLFTYVVDQGWIDKPIAAYTNKGFDAVKNRMSLDEC SRITGVVPE 360
. : : : : : : : : : . : : : : : : : : : . : : : : : : : : : . : : : : . : : : : . :

AroA_S22 DLKKAEEW SYKPKKQTQLPRTMHAYEKGIIWGN DNYVIQS ALLDLV IATHNVGRRGTGV 419
AroA_SY8 DLKKAEEW SYKPKKQTQLPRTMHAYEKGIIWGN DNYVIQS ALLDLV IATHNVGRRGTGV 419
AroA_Afae MLKKAEEW SYKPKKQQAAPRTMHAAYEKGIIWGN DNYVIQS ALLDLV IATHNVGRRGTGV 418
AroA_Hars KLRQAEW SYKPKKQAAPRTMHAAYEKGIIWGN DNYVNIQS ALLDLV IATHNVGRRGTGV 418
AroA_Bmul RLKQADWYKPKKASGHRPRTMHAAYEKGIIWGN DNYVLIQS ALLDV IATHNVGRRGTGV 420
. : : : : : : : : . : : : : : : : : : . : : : : : : : : : . : : : : . : : : : . :

AroA_S22 RMGGHQEQGYARPYPYGDKKIYIDQELIKGKGRMRTWWSNNFQTSNNAQALRVAVLKRAA 479
AroA_SY8 RMGGHQEQGYARPYPYGDKKIYIDQELIKGKGRMRTWWSNNFQTSNNAQALRVAVLKRAA 479
AroA_Afae RMGGHQEQGYRPYPYGDKKIYIDQELIKGKGRMRTWWSNNFQTSNNAQALREAILQRS 478
AroA_Hars RMGGHQEQGYRPYPHTGTEKIYVDQELIQGKGRMRTWWSNNFQTSNNAQALREVLSRQS 478
AroA_Bmul RMGGHQEQGYRPYPGNTKIYVDQELIHKGMMYTAAGANPQFTLNAEHRRAVILHRA 480
. : : : : : : : : . : : : : : : : : : . : : : : : : : : : . : : : : . : : : : . :

AroA_S22 IVKEAMQKARGASTEELVDIYAATQ-QGGLFVASINLYPTKLAEAHMLPAAPHPGETN 538
AroA_SY8 IVKEAMQKARGASTEELVDIYAATQ-QGGLFVASINLYPTKLAEAHMLPAAPHPGETN 538
AroA_Afae IVKQAMQKARGASTEEMVDIYEATQ-NGLLFVTSINLYPTKLAEAHMLPAAPHPGEMN 537
AroA_Hars IVKDAMS KARGASAEEMVDIYDATS-KGGLFVTSINLYPTKLAEAHMLPAAPHPGEMN 537
AroA_Bmul IVR EAMS RER GASTAQLVDVA YDVA VKNKGLFFTNINLYPTKLAEAHMLPAAPHPGEMN 540
. : : : : : : : : . : : : : : : : : : . : : : : : : : : : . : : : : . : : : : . :

AroA_S22 LTMNGERRRILRSQKFMDDPPGGAQADCLIAARIANTL KAMY EK EGN SKM VDRFSGFDWKT 598
AroA_SY8 LTMNGERRRILRSQKFMDDPPGGAQADCLIAARIANTL KAMY EK EGN SKM VDRFSGFDWKT 598
AroA_Afae LTMNGERRRILRSQKFMDDPPGGAQADCLIAARIANALRDMYKDGKAE MAAPQFSGFDWKT 597
AroA_Hars LTMNGERRRILRSQKFMDDPPGGAQADCLIAAANALRDMYKDGKAE MAAPQFSGFDWKT 597
AroA_Bmul LTMNGERRRILSERFMDPPGSA LPDCLIAAIAANTL KQM YEAEKGDHMAAPQFSGFDWKT 600
. : : : : : : : : . : : : : : : : : : . : : : : : : : : : . : : : : . : : : : . :

AroA_S22 EEDAFNDGFRAGQD GAKPIDSQGGDTGHLV TYERLAAAGNNGVQLPVQAYADGR-LKGT 657
AroA_SY8 EEDAFNDGFRAGQD GAKPIDSQGGDTGHLV TYERLAAAGNNGVQLPVQAYADGR-LKGT 657
AroA_Afae EEDAFNDGFRAGQ GAKPAIDSQGGSTGHLV TYERLAAAGNNGVQLPVSWDES LKGT 657
AroA_Hars EEDAFNDGFRAGQ GAEPIDSQGGSTGHLV TYERLAAAGNNGVQLPVIRKVEGK-MIGT 656
AroA_Bmul EEDAFNDGFRAGQ GAEPIDSQGGKTGHLV TYERLARLAAAGNNGVQLPAKSYEGK-LIGT 659
. : : : : : : : : . : : : : : : : : : . : : : : : : : : : . : : : : . : : : : . :

AroA_S22 EMLYTDGKFDTS DGAHFKPAPKAWQGLPE TVAAQKKYKFWLNNGRNNEIWQTAYHDQYNS 717
AroA_SY8 EMLYTDGKFDTS DGAHFKPAPKAWQGLPE TVAAQKKYKFWLNNGRNNEIWQTAYHDQYNS 717
AroA_Afae EMLYTDGKFD TDGKAHFKPAPWNGLPATVQQKDKYKFWLNNGRNNEIWQTAYHDQYNS 717
AroA_Hars A IHYDNKFD TDGKAHFKPAPWNGLPKVEEQKAKKFWLNNGRNNEIWQTAYHDQYNS 716
AroA_Bmul EMLYTDGKFDTDGKAHFKPAPWNGLPKVA DQKAYKFWLNNGRNNEIWQTAYHDQYNS 719
. : : : : : : : : . : : : : : : : : : . : : : : : : : : : . : : : : . : : : : . :

AroA_S22 FAQERYPMAYIEINPDDCKELGVEASDIVEVYDFGSTYAMVYVPEIKRGQTFMMFGYV 777
AroA_SY8 FAQERYPMAYIEINPDDCKELGVEASDIVEVYDFGSTYAMVYVPEIKRGQTFMMFGYV 777
AroA_Afae LMQERYPMAYIEINPDDCKQLDVTTGGDIVEVYDFGSTYAMVYVPAEIKRGQTFMMFGYV 777
AroA_Hars FVKSRYPLAIELEINPDDAQSLGVAA GDVVEVFNFDYGSTYAMAYVPKDMKPSHTFMMFGYV 776
AroA_Bmul FVREVRPMAYIELEINPDDAHS LDI TS GDVVEVFNFDYGSTYAMAYLEP SIKRGQTFMMFGHF 779
. : : * : : : : : : : : . : : : : : : : : : . : : : : : : : : : . : : : : . : : : : . :

AroA_S22 NGIQGDVT TDWTDRNII PYYKGTWGNIRKVGSVEEFRRTISFKSRRFVLG 827
AroA_SY8 NGIQGDVT TDWTDRNII PYYKGTWGNIRKVGSVEEFRRTISFKSRRFVLG 827
AroA_Afae NGIQGDVT TDWTDRDII PYYKGTWGDIRKVGSSEFRKTVSFKSRRFG-- 825
AroA_Hars NGIQGDVT TDWVDRNII PYYKGTWGSVRRIGSIEQYKKTVS TKRRADFNVD 826
AroA_Bmul NGI MGNVTPPWTDRN VV PYYKGTWANLRVGDVQDFKE TVSFKSRRIDVT 829
. : : : : : : : : . : : : : : : : : : . : : : : : : : : : . : : : : . : : : : . :

```

**Figure 1.** Sequence alignment of the *Ralstonia* sp. 22 AroA subunit. Sequence from *Ralstonia* is compared to the sequences from *Achromobacter* SY8 (AroA\_SY8; acc. no. ABP63660); *Alcaligenes faecalis* (AroA\_Afae; acc. no. AAQ19838); *Herminiimonas arsenicoxidans* (AroA\_Hars; acc. no. AAN05581) and *Burkholderia multivorans* (AroA\_Bmul; acc. no. YP 001585636).
