# Supplementary material
Source: PubMed Central journal article supplement (PMC2898339)
Supplement: supp_M110.113761_SupFig2.pdf [file supp_M110.113761_SupFig2.pdf]

```

AroB_S22      MSDPQIFTRRGFLKLSGTGGAVAAATLPIVVPVQAQTPAAPHTGTTLPYPARSIGMAKKL 60
AroB_SY8      MSDPQIFTRRGFLKLSGTGGAVAAATLPIVVPVQAQTPAAPHTGTTLPYPVRSIGMAKKL 60
AroB_Afae     MSDTINLTRRGFLKVS G-G-VAVAATLSPIASANAQKAPADAGR TTLQYPATQVSVAKNL 59
AroB_Hars     MEHQ T--SRRNFLKIAGS SAAVAGAGLVSGN-ANAAPAKVNVGASTLPYPITAVGKAKGL 57
AroB_Bmul     ----MSLNRRQFLKL--T GGAATAATVAGAP--SARAAQADAGR TTLPYTPKVIVRAGQL 52
              .** ***: :. ....* :      .* . . :** *. : * *

AroB_S22      AADTPLQFTYPDSASPCTAVKLGHPVPGGVPDHDIVAFSTMCTHMGCP TVFDNKTKTFK 120
AroB_SY8      AADTPLQFTYPDSASPCTAVKLGHPVPGGVPDHDIVAFSTMCTHMGCP TVFDNKTKTFK 120
AroB_Afae     KANEPVSFTYPDTS SPCVAVKLGSPVPGGVPNNDIVAYSVLCTHMGCP TSYDKSSKTFK 119
AroB_Hars     KVDAPVSFNYPDASS PCVAIKMGQPTPGGVPNNDIVAHSILCTHMGCP VSYDASAKTFK 117
AroB_Bmul     RENVP LAF TFPDASSPCA VVKMGTPVPGGVPQRDIVAFSVLCTHMGCP VSYDAATREFK 112
              : *: *.:**.:***.:.:* * .*****:.****.* :*****. :* :: **

AroB_S22      CPCHFSEFDAEKAGQMICGQATENLPRILLRYDASSDAVSAVGVEGLIYGRQANIL 176
AroB_SY8      CPCHFSEFDAEKAGQMICGQATENLPRILLRYDASSDAVSAVGVEGLIYGRQANIL 176
AroB_Afae     CPCHFTEFDAEKAGQMICGQATENLPRVLLRYDEASDAL TAVGVDGLIYGRQANVI 175
AroB_Hars     CPCHF SVFDPDNHGQMVC GQATENLPQIQLSYNAANDTFTAIGVTGLIYGRQSNIL 173
AroB_Bmul     CPCHFSTFDAEKAGQMVS GQATEKLP AIVLDYNASDGTVRAIAVDGLIYGRQANLL 168
              *****: **.: : **:.*****:** : * * : :... *:. * *****: : :

```

**Figure 2.** Sequence alignments of the *Ralstonia* sp. 22 AroB subunit. Sequence from *Ralstonia* is compared to the sequence from *Achromobacter* SY8 (AroB\_SY8; acc. no. ABP63659); *Alcaligenes faecalis* (AroB\_Afae; acc. no. AAQ19839); *Herminiimonas arsenicoxidans* (AroB\_Hars; acc. no. AAN05580) and *Burkholderia multivorans* (AroB\_Bmul; acc. no. YP\_001585637).
